# Supplementary material for: Elevated plasma matrix metalloproteinases associate with Mycobacterium tuberculosis blood stream infection and mortality in HIV-associated tuberculosis
Source: bioRxiv or medRxiv preprint supplement (doi:10.1101/2023.12.12.23299845), 2023-12-13
Supplement: Supplementary file [file media-1.pdf]

**Elevated plasma matrix metalloproteinases associate with *Mycobacterium tuberculosis* blood stream infection  
and mortality in HIV-associated tuberculosis**

Supplementary Tables and Figure

**Supplementary Table S1 Demographic and Clinical Features of Study Participants**

|                                                | Non-TB           | Confirmed TB     | Clinical TB      | LAM TB           | All participants |
|------------------------------------------------|------------------|------------------|------------------|------------------|------------------|
| Frequency, n (%)                               | 72 (16.5)        | 313 (71.6)       | 48 (11.0)        | 4 (0.9)          | 437 (100)        |
| Median age (years), IQR                        | 39.9 (30.9-49.3) | 35.7 (30.5-43.0) | 38.0 (31.6-42.5) | 36.8 (34.3-37.9) | 36.1 (30.8-43.9) |
| Female, n (%)                                  | 40 (55.6)        | 159 (50.8)       | 29 (60.4)        | 2 (50.0)         | 230 (52.6)       |
| Median CD4 count (cells/mm <sup>3</sup> ), IQR | 89.5 (29.0-224)  | 56 (18.0-112)    | 93.0 (53.8-182)  | 88.0 (26.8-137)  | 62.0 (22.5-133)  |
| On ART, n (%)                                  | 28 (38.9)        | 95 (30.4)        | 19 (39.6)        | 0 (0)            | 142 (32.5)       |
| Mortality at 12 weeks, n (%)                   | 11 (15.3)        | 62 (19.8)        | 9 (18.8)         | 1 (25.0)         | 83 (19.0)        |

Abbreviations: ART = antiretroviral therapy; IQR = interquartile range; LAM = lipoarabinomannan.

**Supplementary Table S2 Matrix metalloproteinase and extracellular matrix breakdown product concentrations**

| Plasma         | No TB  |              | Confirmed TB |              | Clinical TB |              | p values <sup>§</sup> |                      |
|----------------|--------|--------------|--------------|--------------|-------------|--------------|-----------------------|----------------------|
|                | Median | IQR          | Median       | IQR          | Median      | IQR          | No TB vs Confirmed TB | No TB vs Clinical TB |
| MMP-1 (pg/ml)  | 4477   | 1988, 7640   | 5316         | 2686, 9756   | 5163        | 2671, 9799   | 0.112                 | 0.162                |
| MMP-3 (pg/ml)  | 12840  | 8180, 22951  | 10716        | 6934, 15935  | 8535        | 5528, 14080  | <b>0.021</b>          | <b>0.006</b>         |
| MMP-7 (pg/ml)  | 1071   | 455, 1967    | 712          | 330, 1406    | 525         | 174, 1589    | 0.046                 | 0.088                |
| MMP-8 (pg/ml)  | 10602  | 2019, 32205  | 23712        | 7688, 47571  | 4430        | 2156, 27099  | <b>0.003</b>          | 0.324                |
| MMP-9 (pg/ml)  | 26512  | 11079, 45181 | 26574        | 14400, 58120 | 23853       | 12909, 50802 | 0.220                 | 0.667                |
| MMP-10 (pg/ml) | 7809   | 4990, 11089  | 5807         | 4147, 8009   | 5310        | 3798, 7897   | <b>&lt;0.001</b>      | <b>0.001</b>         |
| PIIINP (pg/ml) | 21380  | 14323, 41866 | 22712        | 13978, 40724 | 19308       | 12082, 28705 | 0.941                 | 0.193                |
| HA (ng/ml)     | 8.26   | 5.24, 12.9   | 8.287        | 5.815, 10.88 | 8.815       | 5.29, 15.5   | 0.640                 | 0.872                |
| Col4α1 (ng/ml) | 7.98   | 7.45, 9.65   | 9.81         | 8.42, 12.0   | 11.7        | 7.87, 14.7   | 0.017                 | 0.103                |

Confirmed TB: *Mycobacterium tuberculosis* identified in clinical samples; Clinical TB: TB was likely and the patient was treated for TB but no microbiological confirmation was obtained; No TB: TB was excluded on clinical and microbiological grounds. Abbreviations: Col4α1 = collagen IV alpha 1; HA = Hyaluronic Acid (HA); IQR = interquartile range (IQR); matrix metalloproteinase (MMP); PIIINP = procollagen N-terminal propeptide. HA and Col4α1 measurement were on a random subgroup of 73 participants.

<sup>§</sup>A Bonferroni correction for multiple comparisons indicated that a p value of <0.025 was equivalent to a significance threshold of <0.05. Significant p values are shown in bold.

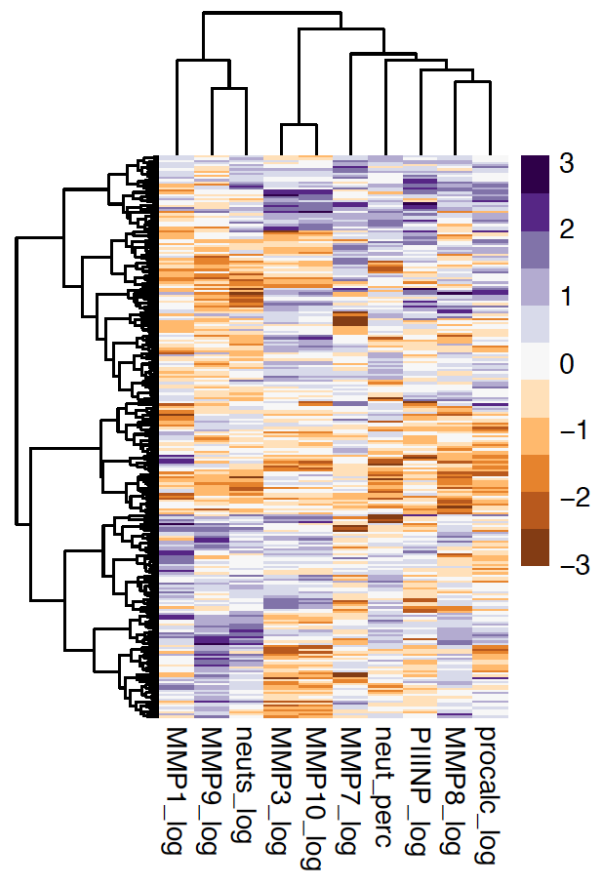

### Supplementary Figure S1 Plasma matrix metalloproteinase-8 associates with collagen turnover and acute inflammation

Hierarchical clustering analysis demonstrates that plasma matrix metalloproteinase-8 (MMP-8) most closely associated with procalcitonin (procalc) concentrations. Plasma MMP-3 and MMP-10 clustered together, whilst MMP-9 mostly closely clustered with neutrophil count (neuts). The analysis was on scaled data, excluding extreme outliers, which were less than ten data points for any one analyte. Neuts\_perc = neutrophil percentage; PIIINP = procollagen III N-terminal propeptide.
